# Supplementary material for: The Human Gut Virome in Hypertension
Source: Front Microbiol. 2018 Dec 19;9:3150. doi: 10.3389/fmicb.2018.03150 (PMC6305721; doi:10.3389/fmicb.2018.03150)
Supplement: Supplementary file 1 [file Table_1.XLSX]

## Sheet: Sheet2
Supplementary Table S1. Comparison of the viral-type and enterotype of 196 samples. The enterotype and viral-type of 36 samples were mismatch and colored by yellow.
Original name	NewSample	Viral-types	Enterotypes
nH10	C1	viral-type 1	enterotype 2
nH36	C10	viral-type 1	enterotype 2
nH37	C11	viral-type 1	enterotype 2
nH65	C12	viral-type 1	enterotype 2
nH7	C13	viral-type 1	enterotype 2
nH98	C14	viral-type 2	enterotype 1
nH82	C15	viral-type 2	enterotype 2
nH57	C16	viral-type 1	enterotype 2
nH55	C17	viral-type 1	enterotype 2
nH93	C18	viral-type 1	enterotype 2
nH87	C19	viral-type 2	enterotype 1
nH11	C2	viral-type 1	enterotype 1
H31	C20	viral-type 2	enterotype 1
nH61	C21	viral-type 1	enterotype 2
nH40	C22	viral-type 2	enterotype 1
nH39	C23	viral-type 1	enterotype 2
nH41	C24	viral-type 1	enterotype 2
H14	C25	viral-type 1	enterotype 1
H17	C26	viral-type 1	enterotype 1
H86	C27	viral-type 1	enterotype 2
nH12	C28	viral-type 1	enterotype 2
nH14	C29	viral-type 1	enterotype 2
nH15	C3	viral-type 1	enterotype 2
nH16	C30	viral-type 1	enterotype 2
nH21	C31	viral-type 1	enterotype 2
nH24	C32	viral-type 1	enterotype 1
H91	C33	viral-type 1	enterotype 2
nH46	C34	viral-type 1	enterotype 2
nH9	C35	viral-type 1	enterotype 2
nH43	C36	viral-type 2	enterotype 1
H45	C37	viral-type 1	enterotype 2
nH91	C38	viral-type 1	enterotype 2
nH89	C39	viral-type 1	enterotype 2
nH17	C4	viral-type 2	enterotype 1
nH76	C40	viral-type 1	enterotype 2
nH13	C41	viral-type 1	enterotype 2
nH22	C5	viral-type 1	enterotype 2
nH25	C6	viral-type 2	enterotype 1
nH26	C7	viral-type 1	enterotype 2
nH29	C8	viral-type 1	enterotype 2
nH30	C9	viral-type 1	enterotype 2
H18	Hy1	viral-type 1	enterotype 2
H83	Hy10	viral-type 1	enterotype 2
nH70	Hy11	viral-type 2	enterotype 2
H34	Hy12	viral-type 1	enterotype 2
H72	Hy13	viral-type 1	enterotype 2
H52	Hy14	viral-type 1	enterotype 2
H1	Hy15	viral-type 2	enterotype 1
H46	Hy16	viral-type 1	enterotype 2
nH23	Hy17	viral-type 1	enterotype 2
H100	Hy18	viral-type 1	enterotype 1
H4	Hy19	viral-type 1	enterotype 1
H21	Hy2	viral-type 2	enterotype 1
H74	Hy20	viral-type 1	enterotype 2
H70	Hy21	viral-type 2	enterotype 1
H90	Hy22	viral-type 1	enterotype 2
H76	Hy23	viral-type 1	enterotype 1
H30	Hy24	viral-type 1	enterotype 2
H27	Hy25	viral-type 1	enterotype 2
H38	Hy26	viral-type 1	enterotype 2
H92	Hy27	viral-type 2	enterotype 1
H96	Hy28	viral-type 1	enterotype 1
nH28	Hy29	viral-type 1	enterotype 2
H43	Hy3	viral-type 1	enterotype 2
nH45	Hy30	viral-type 1	enterotype 2
H82	Hy31	viral-type 2	enterotype 1
nH5	Hy32	viral-type 1	enterotype 2
H81	Hy33	viral-type 2	enterotype 1
nH6	Hy34	viral-type 1	enterotype 2
nH59	Hy35	viral-type 1	enterotype 1
nH60	Hy36	viral-type 1	enterotype 2
H36	Hy37	viral-type 2	enterotype 1
H28	Hy38	viral-type 1	enterotype 1
nH97	Hy39	viral-type 1	enterotype 2
H60	Hy4	viral-type 1	enterotype 2
nH8	Hy40	viral-type 1	enterotype 2
H84	Hy41	viral-type 2	enterotype 1
H77	Hy42	viral-type 2	enterotype 1
H98	Hy43	viral-type 1	enterotype 2
H13	Hy44	viral-type 1	enterotype 1
H33	Hy45	viral-type 1	enterotype 2
H47	Hy46	viral-type 2	enterotype 1
H5	Hy47	viral-type 2	enterotype 1
H25	Hy48	viral-type 1	enterotype 1
H39	Hy49	viral-type 2	enterotype 1
H63	Hy5	viral-type 1	enterotype 2
nH66	Hy50	viral-type 1	enterotype 1
H23	Hy51	viral-type 2	enterotype 1
H67	Hy52	viral-type 2	enterotype 1
H9	Hy53	viral-type 1	enterotype 1
H65	Hy54	viral-type 1	enterotype 2
H42	Hy55	viral-type 1	enterotype 1
H12	Hy56	viral-type 2	enterotype 1
H26	Hy57	viral-type 1	enterotype 2
H62	Hy58	viral-type 1	enterotype 2
H55	Hy59	viral-type 2	enterotype 1
H94	Hy6	viral-type 1	enterotype 2
H11	Hy60	viral-type 1	enterotype 1
H19	Hy61	viral-type 1	enterotype 2
H35	Hy62	viral-type 1	enterotype 1
H40	Hy63	viral-type 2	enterotype 1
H44	Hy64	viral-type 2	enterotype 1
H57	Hy65	viral-type 1	enterotype 2
H58	Hy66	viral-type 1	enterotype 2
H66	Hy67	viral-type 1	enterotype 2
H87	Hy68	viral-type 1	enterotype 2
H88	Hy69	viral-type 1	enterotype 2
H6	Hy7	viral-type 1	enterotype 1
H89	Hy70	viral-type 1	enterotype 2
H95	Hy71	viral-type 1	enterotype 2
H97	Hy72	viral-type 1	enterotype 2
nH2	Hy73	viral-type 1	enterotype 2
nH4	Hy74	viral-type 2	enterotype 1
H73	Hy75	viral-type 2	enterotype 1
H80	Hy76	viral-type 2	enterotype 1
H37	Hy77	viral-type 1	enterotype 2
H49	Hy78	viral-type 1	enterotype 1
H54	Hy79	viral-type 2	enterotype 2
nH85	Hy8	viral-type 1	enterotype 2
H2	Hy80	viral-type 1	enterotype 1
H22	Hy81	viral-type 1	enterotype 1
H48	Hy82	viral-type 1	enterotype 2
nH62	Hy83	viral-type 1	enterotype 2
nH56	Hy84	viral-type 1	enterotype 2
H93	Hy85	viral-type 1	enterotype 2
H15	Hy86	viral-type 1	enterotype 2
nH51	Hy87	viral-type 1	enterotype 2
H3	Hy88	viral-type 1	enterotype 2
H8	Hy89	viral-type 1	enterotype 2
nH80	Hy9	viral-type 2	enterotype 1
H10	Hy90	viral-type 1	enterotype 2
H85	Hy91	viral-type 2	enterotype 1
nH31	Hy92	viral-type 1	enterotype 1
H20	Hy93	viral-type 2	enterotype 1
H61	Hy94	viral-type 2	enterotype 1
H64	Hy95	viral-type 2	enterotype 2
H99	Hy96	viral-type 2	enterotype 1
H59	Hy97	viral-type 2	enterotype 1
nH3	Hy98	viral-type 1	enterotype 2
nH38	Hy99	viral-type 2	enterotype 2
H16	P1	viral-type 1	enterotype 1
nH95	P10	viral-type 2	enterotype 1
H68	P11	viral-type 2	enterotype 1
H71	P12	viral-type 2	enterotype 1
H75	P13	viral-type 1	enterotype 1
H79	P14	viral-type 2	enterotype 2
H50	P15	viral-type 2	enterotype 1
nH86	P16	viral-type 1	enterotype 2
nH81	P17	viral-type 1	enterotype 2
nH79	P18	viral-type 1	enterotype 1
H32	P19	viral-type 1	enterotype 2
H24	P2	viral-type 2	enterotype 1
nH67	P20	viral-type 1	enterotype 2
nH69	P21	viral-type 2	enterotype 2
nH72	P22	viral-type 1	enterotype 2
nH73	P23	viral-type 2	enterotype 1
nH74	P24	viral-type 1	enterotype 2
nH75	P25	viral-type 1	enterotype 2
nH90	P26	viral-type 2	enterotype 1
nH92	P27	viral-type 2	enterotype 1
nH42	P28	viral-type 1	enterotype 1
nH52	P29	viral-type 2	enterotype 1
H41	P3	viral-type 1	enterotype 2
nH53	P30	viral-type 1	enterotype 1
nH54	P31	viral-type 2	enterotype 2
nH63	P32	viral-type 1	enterotype 2
nH78	P33	viral-type 2	enterotype 1
nH88	P34	viral-type 2	enterotype 1
nH94	P35	viral-type 2	enterotype 1
nH19	P36	viral-type 2	enterotype 1
H51	P37	viral-type 1	enterotype 2
nH100	P38	viral-type 1	enterotype 2
nH18	P39	viral-type 1	enterotype 2
H56	P4	viral-type 1	enterotype 2
nH20	P40	viral-type 1	enterotype 2
nH32	P41	viral-type 1	enterotype 2
nH34	P42	viral-type 1	enterotype 2
nH35	P43	viral-type 1	enterotype 1
nH47	P44	viral-type 1	enterotype 1
nH27	P45	viral-type 2	enterotype 1
nH1	P46	viral-type 1	enterotype 2
nH50	P47	viral-type 1	enterotype 2
nH99	P48	viral-type 1	enterotype 2
nH58	P49	viral-type 2	enterotype 1
H7	P5	viral-type 1	enterotype 2
nH84	P50	viral-type 1	enterotype 2
nH68	P51	viral-type 1	enterotype 2
nH49	P52	viral-type 1	enterotype 1
H29	P53	viral-type 2	enterotype 1
nH96	P54	viral-type 1	enterotype 2
nH83	P55	viral-type 1	enterotype 2
nH77	P56	viral-type 1	enterotype 2
nH33	P6	viral-type 1	enterotype 2
nH44	P7	viral-type 2	enterotype 1
nH48	P8	viral-type 2	enterotype 1
nH64	P9	viral-type 2	enterotype 1
